# Supplementary material for: Transplantation of hPSC-derived pericyte-like cells promotes functional recovery in ischemic stroke mice
Source: PubMed Central journal article supplement (PMC7566513; doi:10.1038/s41467-020-19042-y), 2020-10-15
Supplement: 41467_2020_19042_MOESM4_ESM.pdf [file 41467_2020_19042_MOESM4_ESM.pdf]

## **Description of Additional Supplementary Files**

Supplementary Movie 1 Cord formation of HBVPs

Supplementary Movie 2 Cord formation of CNC PCs

Supplementary Movie 3 Location of transplanted CNC PCs
